# Supplementary material
Source: PubMed Central journal article supplement (PMC3199221)

**A**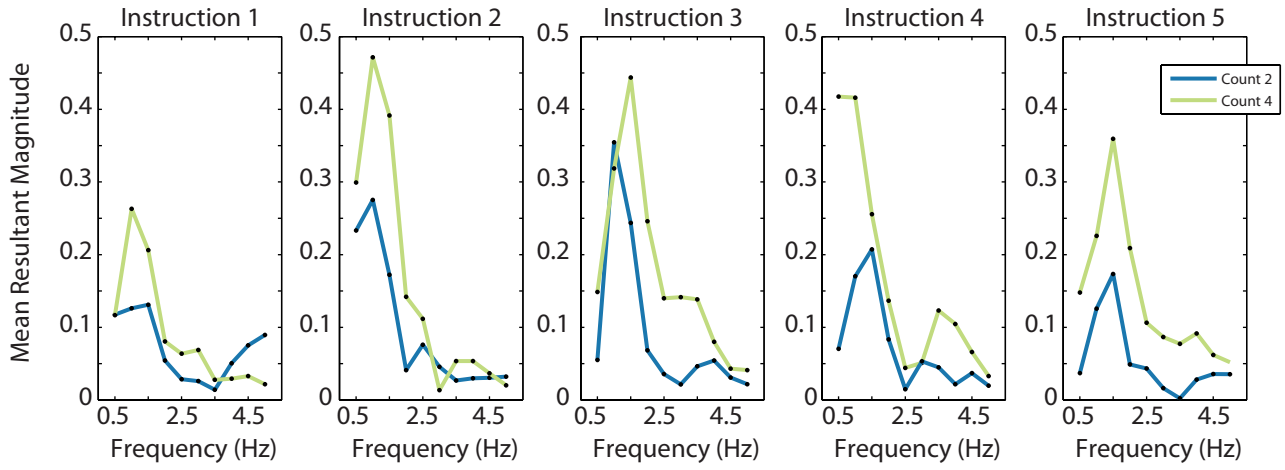**B**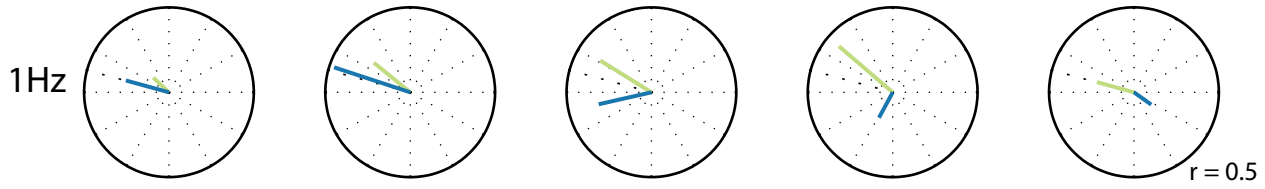

Supplement: NIHMS179760-supplement-01.pdf [file NIHMS179760-supplement-01.pdf]
